# Supplementary material for: Comparative Expression Profiling Reveals Molecular Markers Involved in the Progression of Cutaneous Melanoma towards Metastasis
Source: MDPI journal article supplement (doi:10.3390/ijms24076565), 2023-03-31
Supplement: s1 [file s1]

**Table S1. (A)** List of differentially expressed genes in MNT-1 cell line compared to MelJuSo cells

| Gene  | Fold Difference             | T-TEST      | Fold Up- or Down-Regulation |
|-------|-----------------------------|-------------|-----------------------------|
|       | Test Sample /Control Sample | p-value     | Test Sample /Control Sample |
| MITF  | 3.616512996                 | 5.96207E-06 | 3.616512996                 |
| BRAF  | 3.945386556                 | 6.47205E-05 | 3.945386556                 |
| KRAS  | 3.224703169                 | 0.000926793 | 3.224703169                 |
| NRAS  | 0.632658497                 | 0.219456341 | -1.58063158                 |
| BCL2  | 26.01311481                 | 1.81238E-09 | 26.01311481                 |
| EGF   | 9.322183878                 | 7.37221E-05 | 9.322183878                 |
| EGFR  | 53.13047417                 | 4.36894E-10 | 53.13047417                 |
| IGF1  | 16.25151812                 | 5.53056E-06 | 16.25151812                 |
| IGF2  | 16.21398848                 | 0.001769113 | 16.21398848                 |
| FGFR2 | 45.05664074                 | 1.66062E-05 | 45.05664074                 |
| FGFR4 | 8.127059237                 | 6.55312E-13 | 8.127059237                 |
| MMP1  | 18.11775452                 | 2.72919E-13 | 18.11775452                 |
| MMP2  | 21.11455513                 | 1.01272E-08 | 21.11455513                 |
| MMP3  | 19.19287611                 | 1.40483E-14 | 19.19287611                 |

|          |             |             |              |
|----------|-------------|-------------|--------------|
| MMP9     | 23.50398292 | 1.84565E-09 | 23.50398292  |
| RHOU     | 2.086619647 | 9.97469E-05 | 2.086619647  |
| TNF      | 38.99365328 | 4.16185E-05 | 38.99365328  |
| IL1B     | 4.602759836 | 4.4044E-05  | 4.602759836  |
| IL6      | 2.287597111 | 0.00589901  | 2.287597111  |
| IL8      | 0.433218685 | 0.029558976 | -2.308303021 |
| IL18     | 5.578324378 | 3.09294E-10 | 5.578324378  |
| VEGFA    | 0.404113825 | 0.005662779 | -2.47455033  |
| FLT1     | 3.888025889 | 1.29965E-05 | 3.888025889  |
| HLA-A    | 0.353431266 | 0.001326601 | -2.829404458 |
| HLA-DRB1 | 0.04984184  | 0.000434932 | -20.0634648  |
| KIR2DL3  | 8.037990732 | 1.07896E-05 | 8.037990732  |
| MAGEC1   | 112.6470112 | 8.74115E-09 | 112.6470112  |

**Table S1. (B)** List of differentially expressed genes in VMM1 cell line compared to MelJuSo cells

| Gene     | Fold Difference             | T-TEST      | Fold Up- or Down-Regulation |
|----------|-----------------------------|-------------|-----------------------------|
|          | Test Sample /Control Sample | p-value     | Test Sample /Control Sample |
| MITF     | 0.044209478                 | 0.000279133 | -22.61958409                |
| BRAF     | 1.068188792                 | 0.538420589 | 1.068188792                 |
| KRAS     | 0.645952493                 | 0.001746577 | -1.548101464                |
| NRAS     | 1.6492757                   | 0.036402799 | 1.6492757                   |
| BCL2     | 0.229118713                 | 2.49526E-08 | -4.364549651                |
| EGF      | 1.747347993                 | 7.49102E-05 | 1.747347993                 |
| EGFR     | 110.4946897                 | 8.74348E-09 | 110.4946897                 |
| IGF1     | 3.239658218                 | 9.00796E-06 | 3.239658218                 |
| IGF2     | 4.178064815                 | 6.55415E-05 | 4.178064815                 |
| FGFR2    | 0.335449361                 | 0.002619528 | -2.98107588                 |
| FGFR4    | 0.864277399                 | 0.001766503 | -1.157035925                |
| MMP1     | 7.76740089                  | 1.58598E-08 | 7.76740089                  |
| MMP2     | 150.7346076                 | 6.0105E-06  | 150.7346076                 |
| MMP3     | 9.723653021                 | 3.81826E-08 | 9.723653021                 |
| MMP9     | 1.303597961                 | 6.83169E-06 | 1.303597961                 |
| RHOU     | 8.374681748                 | 6.14694E-08 | 8.374681748                 |
| TNF      | 1.010566999                 | 0.850413048 | 1.010566999                 |
| IL1B     | 33.04055349                 | 1.13641E-06 | 33.04055349                 |
| IL6      | 24.95228325                 | 8.96535E-06 | 24.95228325                 |
| IL8      | 65.0060109                  | 1.63791E-09 | 65.0060109                  |
| IL18     | 0.27071224                  | 0.019784861 | -3.693959308                |
| VEGFA    | 14.41501494                 | 2.07115E-09 | 14.41501494                 |
| FLT1     | 5.149262301                 | 3.60111E-05 | 5.149262301                 |
| HLA-A    | 0.243754537                 | 0.002831543 | -4.102487743                |
| HLA-DRB1 | 2.013214168                 | 0.01303085  | 2.013214168                 |
| KIR2DL3  | 0.913726118                 | 0.212234892 | -1.094419849                |
| MAGEC1   | 18.85009872                 | 1.06461E-08 | 18.85009872                 |

**Table S1. (C)** List of differentially expressed genes in VMM1 cell line compared to MNT-1 cells

| Gene     | Fold Difference             | T-TEST      | Fold Up- or Down-Regulation |
|----------|-----------------------------|-------------|-----------------------------|
|          | Test Sample /Control Sample | p-value     | Test Sample /Control Sample |
| MITF     | 0.012382963                 | 9.10223E-05 | -80.7561169                 |
| BRAF     | 0.27074376                  | 8.93382E-05 | -3.693529259                |
| KRAS     | 0.200313784                 | 3.26927E-05 | -4.992167698                |
| NRAS     | 2.511182617                 | 3.25346E-06 | 2.511182617                 |
| BCL2     | 0.008807815                 | 1.59437E-09 | -113.5355312                |
| EGF      | 0.187426826                 | 2.08538E-05 | -5.335415543                |
| EGFR     | 2.079685745                 | 1.28014E-07 | 2.079685745                 |
| IGF1     | 0.199344959                 | 1.09857E-05 | -5.01642983                 |
| IGF2     | 0.25768273                  | 0.00421895  | -3.880741252                |
| FGFR2    | 0.006019387                 | 1.55602E-05 | -166.1298624                |
| FGFR4    | 0.10634565                  | 2.16271E-10 | -9.403299503                |
| MMP1     | 0.428717636                 | 2.74791E-09 | -2.332537586                |
| MMP2     | 7.138895736                 | 1.06877E-05 | 7.138895736                 |
| MMP3     | 0.506628239                 | 2.73766E-08 | -1.973833915                |
| MMP9     | 0.055462853                 | 1.96095E-09 | -18.03008567                |
| RHOU     | 3.493968786                 | 0.000210052 | 3.493968786                 |
| TNF      | 0.025916192                 | 4.16407E-05 | -38.58591595                |
| IL1B     | 7.178422222                 | 2.10491E-06 | 7.178422222                 |
| IL6      | 10.90763891                 | 1.31717E-05 | 10.90763891                 |
| IL8      | 150.0535713                 | 2.92252E-09 | 150.0535713                 |
| IL18     | 0.048082871                 | 8.34047E-06 | -20.79742683                |
| VEGFA    | 35.67067999                 | 3.25671E-08 | 35.67067999                 |
| FLT1     | 1.373028348                 | 0.000706324 | 1.373028348                 |
| HLA-A    | 0.689680173                 | 0.334892339 | -1.449947437                |
| HLA-DRB1 | 40.39205161                 | 0.000892407 | 40.39205161                 |
| KIR2DL3  | 0.113675936                 | 1.12158E-05 | -8.796936607                |
| MAGEC1   | 0.167337762                 | 1.85333E-08 | -5.975937468                |

**Table S1. (D)** List of differentially expressed miRNAs in MNT-1 cell line compared to MelJuSo cells

| miRNA            | Fold Difference             | T-TEST      | Fold Up- or Down-Regulation |
|------------------|-----------------------------|-------------|-----------------------------|
|                  | Test Sample /Control Sample | p-value     | Test Sample /Control Sample |
| hsa-miR-100-5p   | 0.121694358                 | 2.88115E-10 | -8.217307812                |
| hsa-miR-125b-5p  | 0.342323606                 | 8.71533E-09 | -2.92121251                 |
| hsa-miR-129-2-3p | 1.483906072                 | 1.4319E-07  | 1.483906072                 |
| hsa-let-7a-5p    | 0.895049904                 | 4.03476E-06 | -1.117256139                |
| hsa-let-7d-5p    | 0.204381239                 | 4.6221E-09  | -4.89281699                 |
| hsa-let-7e-5p    | 2.326348252                 | 8.11493E-08 | 2.326348252                 |
| hsa-let-7f-5p    | 0.566743592                 | 6.10291E-06 | -1.764466355                |
| hsa-let-7g-5p    | 0.430972437                 | 2.06288E-08 | -2.320334005                |

**Table S1. (E)** List of differentially expressed miRNAs in VMM1 cell line compared to MelJuSo cells

| miRNA            | Fold Difference             | T-TEST   | Fold Up- or Down-Regulation |
|------------------|-----------------------------|----------|-----------------------------|
|                  | Test Sample /Control Sample | p-value  | Test Sample /Control Sample |
| hsa-miR-100-5p   | 2.147511925                 | 2.17E-08 | 2.147511925                 |
| hsa-miR-125b-5p  | 2.753624984                 | 1.2E-08  | 2.753624984                 |
| hsa-miR-129-2-3p | 0.195205686                 | 3.4E-11  | -5.122801591                |
| hsa-let-7a-5p    | 6.194554167                 | 3.17E-09 | 6.194554167                 |
| hsa-let-7d-5p    | 1.790464814                 | 6.97E-08 | 1.790464814                 |
| hsa-let-7e-5p    | 0.583983683                 | 1.68E-06 | -1.712376611                |
| hsa-let-7f-5p    | 4.291057283                 | 1.2E-08  | 4.291057283                 |
| hsa-let-7g-5p    | 3.113061923                 | 8.82E-09 | 3.113061923                 |

**Table S1. (F)** List of differentially expressed miRNAs in VMM1 cell line compared to MNT-1 cells

| miRNA            | Fold Difference             | T-TEST   | Fold Up- or Down-Regulation |
|------------------|-----------------------------|----------|-----------------------------|
|                  | Test Sample /Control Sample | p-value  | Test Sample /Control Sample |
| hsa-miR-100-5p   | 17.64676652                 | 1.94E-09 | 17.64676652                 |
| hsa-miR-125b-5p  | 8.043923752                 | 2.64E-09 | 8.043923752                 |
| hsa-miR-129-2-3p | 0.131548546                 | 2.8E-09  | -7.601756385                |
| hsa-let-7a-5p    | 6.920903672                 | 2.9E-09  | 6.920903672                 |
| hsa-let-7d-5p    | 8.760416662                 | 2.65E-09 | 8.760416662                 |
| hsa-let-7e-5p    | 0.251030207                 | 9.99E-09 | -3.983584336                |
| hsa-let-7f-5p    | 7.571426203                 | 2.72E-09 | 7.571426203                 |
| hsa-let-7g-5p    | 7.223343438                 | 2.9E-09  | 7.223343438                 |
